# Supplementary material
Source: Springer Nature journal article supplement (https://www.springermedizin.de/resource/supplementary/12888_2009_674_MOESM1_ESM.doc/9478124)

**
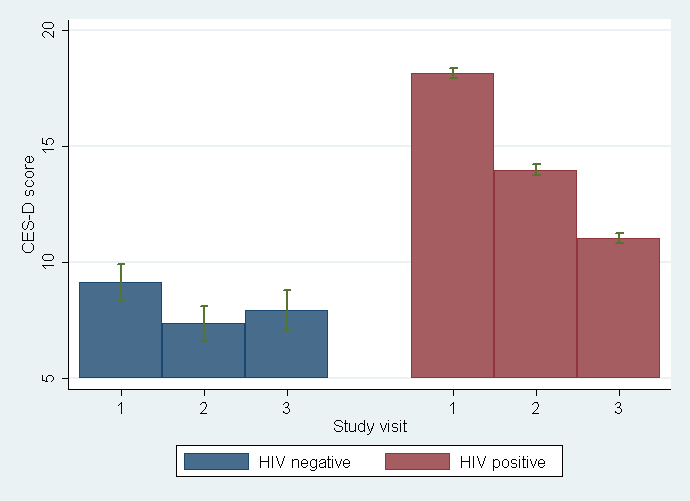
**

Supplement: MOESM1 [file 9478124]
